# Supplementary material for: Urinary Continence Recovery after Robotic Radical Prostatectomy without Anterior or Posterior Reconstruction: Experience from a Tertiary Referral Center
Source: MDPI journal article supplement (doi:10.3390/jcm12041358), 2023-02-08
Supplement: s1 [file s1]

**Table S2. Intra and histopatological features.**

| <b>Variables</b>                                                                                                                                                                                                                             | <b>n=518</b>                                                  |
|----------------------------------------------------------------------------------------------------------------------------------------------------------------------------------------------------------------------------------------------|---------------------------------------------------------------|
| <i>Surgical Features</i>                                                                                                                                                                                                                     |                                                               |
| Nerve sparing RALP, n (%)                                                                                                                                                                                                                    | 304 (58,6,8)                                                  |
| Monolateral Nerve sparing RALP n (%)                                                                                                                                                                                                         | 165 (31,8)                                                    |
| Bilateral Nerve sparing RALP n (%)                                                                                                                                                                                                           | 139 (26,8)                                                    |
| Pelvic lymph node dissection during (LND) RALP, n (%)                                                                                                                                                                                        | 237 (45,5)                                                    |
| <i>Histopatologic features</i>                                                                                                                                                                                                               |                                                               |
| <ul style="list-style-type: none"> <li>- Definitive histology findings, n (%)</li> <li>- Acinar adenocarcinoma</li> <li>- Intraductal carcinoma</li> <li>- Mixed</li> <li>- Others (sarcomatoid, squamous and adenosquamous)</li> </ul>      | 486 (93,8)<br>4 (0,8)<br>9 (1,7)<br>19 (3,7)                  |
| Clinically significant positive surgical margin (PSM) , more than 2mm, n (%)                                                                                                                                                                 | 40 (7,7)                                                      |
| Highest ISUP Grade Group Post-RP histopathologic assessment, n (%) <ul style="list-style-type: none"> <li>- Grade Group 1</li> <li>- Grade Group 2</li> <li>- Grade Group 3</li> <li>- Grade Group 4</li> <li>- Grade Group 5</li> </ul>     | 39 (7,6)<br>256 (49,8)<br>83 (16,1)<br>82 (16,0)<br>54 (10,5) |
| Gleason Score (GS) at definitive Post-RP histopathologic assessment , n (%) <ul style="list-style-type: none"> <li>- GS 6 (3+3)</li> <li>- GS 7 (3+4 and 4+3)</li> <li>- GS 8 (4+4 and 5+3 and 3+5)</li> <li>- GS 9 (4+5 and 5+4)</li> </ul> | 39 (7,6)<br>373 (72,6)<br>60 (11,7)<br>42 (8,2)               |
| Perineural Invasion (IPN) at definitive Post-RP histopathologic assessment, n (%)                                                                                                                                                            | 234 (45,2)                                                    |
| pT, n (%) <ul style="list-style-type: none"> <li>- T2</li> <li>- T3</li> <li>- T4</li> </ul>                                                                                                                                                 | 214 (41,3)<br>302 (58,3)<br>2 (0,4)                           |
| pN, n (%) <ul style="list-style-type: none"> <li>- Nx</li> <li>- N0</li> <li>- N1</li> </ul>                                                                                                                                                 | 281 (54,2)<br>189 (36,5)<br>48 (9,3)                          |
| pM, n (%) <ul style="list-style-type: none"> <li>- Mx</li> <li>- M0</li> <li>- M1 (extraregional LND)</li> </ul>                                                                                                                             | 490 (94,6)<br>26 (5,0)<br>2 (0,4)                             |
