# Supplementary material for: Urinary Continence Recovery after Robotic Radical Prostatectomy without Anterior or Posterior Reconstruction: Experience from a Tertiary Referral Center
Source: MDPI journal article supplement (doi:10.3390/jcm12041358), 2023-02-08
Supplement: s1 [file s1]

**Supplementary Table S3. Post-operative features and follow-up of patients with MRI**

| Variables                                                                                                                                             | n=518       |
|-------------------------------------------------------------------------------------------------------------------------------------------------------|-------------|
| Follow-up                                                                                                                                             |             |
| Duration of follow-up, months, Median (IQR)                                                                                                           | 14 (8-19)   |
| Biochemical recurrence (BCR)at last follow-up                                                                                                         | 18 (3,5)    |
| Of patients with BCR:                                                                                                                                 |             |
| - adjuvant radiotherapy ( in 4 cases concomitant ormonotherapy)                                                                                       | 12 (42)     |
| - salvage radiotherapy                                                                                                                                | 2 (12)      |
| - systemic ormonotherapy                                                                                                                              | 4 (14)      |
| Early (30-days) continence rate, n (%)                                                                                                                |             |
| - Fully continent, No pad/die                                                                                                                         | 426 (82,3)  |
| - 1 or more pads/die                                                                                                                                  | 92 (17,7)   |
| Continence at last follow-up , n (%)                                                                                                                  |             |
| - Fully continent, No pad/die                                                                                                                         | 481 (93,05) |
| - 1 or more pads/die                                                                                                                                  | 37 (6,95)   |
| Clavien Dindo (CD) > 2 within 30 days), n(%)                                                                                                          |             |
| - CD IIIa<br>(6 cases requiring percutaneous drainage for symptomatic lymphocele, 5 cases 3 requiring endoscopic catheter positioning for mdc spread) | 9 (2,1)     |
| - CD IIIb<br>( 4 endoscopic urethrotomy for ureteral stricture )                                                                                      | 4 (0,7)     |
| - CD IV<br>( 1 case of post-operative cerebrovascular ischemia requiring neurovascular thrombolysis)                                                  | 1 (0,1)     |
| Clavien Dindo (CD) > 2 after 30 days), n (%)                                                                                                          |             |
| - CD IIIa<br>( 7 cases requiring percutaneous drainage for symptomatic lymphocele, 4 percutaneous drainage for abdominal abscessus,                   | 11 (2,1)    |
| - CD IIIb<br>(8 endoscopic urethrotomy for endoscopic stricture,                                                                                      | 8 (1,5)     |
| - CD IV<br>( 1 case of acute abdomen for bowel strangulation )                                                                                        | 1 (0,1)     |
