# Supplementary material for: Urinary Continence Recovery after Robotic Radical Prostatectomy without Anterior or Posterior Reconstruction: Experience from a Tertiary Referral Center
Source: MDPI journal article supplement (doi:10.3390/jcm12041358), 2023-02-08
Supplement: s1 [file s1]

**Table S1. Patient's and tumour's characteristics for those receiving MRI**

| <b>Variables</b>                                               |  | <b>n=518</b>     |
|----------------------------------------------------------------|--|------------------|
| <i>Patient's characteristics</i>                               |  |                  |
| Age at diagnosis, yrs, median (IQR)                            |  | 67 (62 - 71)     |
| BMI at surgery, kg/m <sup>2</sup> , median (IQR)               |  | 26 (24 - 28,4)   |
| Charlson Comorbidity index (CCI)                               |  | 1 (0-2)          |
| Diabetes mellitus, n (%)                                       |  | 40 (7,7)         |
| Anticoagulant/antiaggregant, n (%)                             |  | 121 (23,4)       |
| Family history of prostate cancer, n (%)                       |  | 60 (11,6)        |
| Preoperative urinary incontinence (UI)*, n (%)                 |  | 6 (1,2)          |
| Preoperative ED, n (%)                                         |  | 91 (17,6)        |
| Positive DRE, n (%)                                            |  | 247 (47,7)       |
| PSA value at diagnosis, ng/mL, Median (IQR)                    |  | 6.3 (4.3 - 9.1)  |
| Prostate Volume, cc, Median ° (IQR)                            |  | 45 (34.0 – 58.0) |
| <i>Characteristics at biopsy</i>                               |  |                  |
| Type of biopsy, n (%)                                          |  |                  |
| - Cognitive Biopsy                                             |  | 170 (32,8)       |
| - MRI-targeted biopsy                                          |  | 348 (67,2)       |
| Highest ISUP Grade Group at MRI targeted – biopsy cores, n (%) |  |                  |
| - Patients with no positive random – biopsy cores              |  | 185 (35,7)       |
| - Grade Group 1                                                |  | 39 (7,5)         |
| - Grade Group 2                                                |  | 109 (21,0)       |
| - Grade Group 3                                                |  | 108 (20,8)       |
| - Grade Group 4                                                |  | 37 (7,1)         |
| - Grade Group 5                                                |  | 40 (7,7)         |
| Extra Capsular Invasion at biopsy, n (%)                       |  | 5 (1,0)          |
| Seminal Vesicles Invasion at biopsy, n (%)                     |  | 0 (0)            |
| Perineural Invasion at biopsy (PNI), n (%)                     |  | 116 (22,4)       |
| <i>Characteristics at imaging</i>                              |  |                  |
| Extra Capsular Extension at imaging, n (%)                     |  | 30 (5,8)         |
| Seminal Vesicles Invasion at imaging, n (%)                    |  | 11 (2,1)         |
| cT, n(%)                                                       |  | 213 (41,1)       |
| - T1                                                           |  | 282 (54,4)       |
| - T2                                                           |  | 23 (4,4)         |
| - T3-4                                                         |  |                  |
| cN+, n (%)                                                     |  | 27 (5,2)         |
| Localized disease §                                            |  | 475 (91,7)       |
| Novel risk categories , n(%)                                   |  |                  |
| - Group 1-low-risk                                             |  | 43 (8,3)         |
| - Group 2- intermediate risk                                   |  | 312 (60,2)       |
| - Group 3- high risk                                           |  | 152 (29,3)       |
| - Group 4- veriy high risk                                     |  | 11 (2,1)         |

\*UI defined according to EPIC criteria as the need for of more than one Pad per day;° Prostate volume was assessed at sovrapubic ultrasound and/or MRI, if available; Ç The grade group was evaluated only on patients with random samples at biopsy (n = 925). If case of multiple Gleason scores in the same patient, the highest was considered.; § Localized disease was defined as the presence of cT1-2, N0 M0 prostatic cancer, according to EAU Guidelines

BMI: body mass index; ED: erectile dysfunction; MRI: magnetic resonance imaging; TURP: transurethral resection of prostate
